# Supplementary material
Source: Research Square preprint supplement (doi:10.21203/rs.3.rs-9783043/v1)
Supplement: Supplementary file 1 [file 87e64ce829495bc15fc637d3.docx]

Table 1. Characteristics of 189 patients treated with radical prostatectomy (group A), radiotherapy (group B) and combined method (group C) for prostate cancer.

|  | Group A  (N=62) | Group B  (N=91) | Group C  (N=36) | p (ANOVA Kruskal-Wallis) |
| --- | --- | --- | --- | --- |
| Time from the end of treatment to the survey [years] Median  Range | 6.7  5.1-10.6 | 6.2  5.0-10.5 | 7.1  5.1-10.9 | 0.013 |
| Age during treatment [years]  Median  Range | 65  52-72 | 69  51-77 | 66  49-76 | <0.001 |
| Age during the survey [years]  Median  Range | 70  57-81 | 75  56-85 | 71  54-82 | <0.001 |
| PSA [ng/ml]  Median  Range | 8.35  0.41-19.78 | 13.0  1.7-64 | 12.5  3.85-56.6 | <0.001 |
| Gleason score  Median  Range | 6  6-8 | 6  6-9 | 6  6-8 | 0.585 |
| Clinical stage T  T1c  T2a  T2b  T2c | 29 (46.9%)  10 (16.1%)  16 (25.8%)  7 (11.2%) | 24 (26.4%)  28 (30.8%)  14 (15.4%)  25 (27.5%) | 24 (66.6%)  3 (8.3%)  6 (16.6%)  3 (8.3%) | 0.003 |
| Risk group  Low risk  Intermediate risk  High risk | 23 (37.1%)  27 (43.6%)  12 (19.3%) | 24 (26.4%)  19 (20.9%)  48 (52.7%) | 8 (22.2%)  14 (38.9%)  14 (38.9%) | 0.006 |
| Hormonal treatment  SCADT  LCADT  No ADT | 2 (3.2%)  0  60 (96.8%) | 16 (17.6%)  65 (71.4%)  10 (11%) | 8 (22.2%)  26 (72.2%)  2 (5.6%) | <0.001 |

Table 2. Characteristics of comorbidities in patients with prostate cancer

|  | Group A  (N=62) | Group B  (N=91) | Group C  (N=36) | p (ANOVA Kruskal-Wallis) |
| --- | --- | --- | --- | --- |
| Comorbidities | 31 (50%) | 66 (72.5%) | 22 (611%) | 0.018 |
| Cardiac and vascular diseases | 17 (27.4%) | 42 (46.2%) | 14 (38.9%) | 0.07 |
| Neurological diseases | 1 (1.6%) | 12 (13.2%) | 2 (5.6%) | 0.03 |
| Other malignant tumors | 1 (1.6%) | 6 (6.6%) | 2 (5.6%) | 0.36 |
| Spine disorders | 4 (6.5%) | 9 (9.9%) | 6 (16.7%) | 0.27 |
| Digestive tract diseases | 2 (3.2%) | 11 (12.1%) | 5 (13.9%) | 0.12 |
| Urinary system diseases (except prostate) | 2 (3.2%) | 6 (6.6%) | 6 (16.7%) | 0.047 |
| Previous surgeries | 17 (27.4%) | 25 (27.4%) | 7 (19.4%) | 0.62 |
| Mental diseases | 1 (1.6%) | 1 (1.1%) | 1 (2.8%) | 0.79 |

Table 3. Scoring of the quality of life of 189 patients in terms of physical, emotional and social functioning according to the QLQ-C30 questionnaire, depending on the treatment method

|  | Group A | | Group B | | Group C | | p (Kruskal-Wallis ANOVA test) |
| --- | --- | --- | --- | --- | --- | --- | --- |
|  | N= |  | N= |  | N= |
| General health status | 62.1 | 33 | 60.2 | 72 | 68.9 | 29 | 0.09 |
| physical functionings | 83.4 | 33 | 78.5 | 76 | 84.4 | 31 | 0.36 |
| functioning in life roles | 88.4 | 33 | 84.9 | 74 | 87.1 | 31 | 0.77 |
| emotional functioning | 84.8 | 32 | 73.7 | 73 | 80.5 | 29 | 0.02 |
| cognitive functioning | 83.3 | 31 | 80.0 | 75 | 86.8 | 29 | 0.10 |
| social functioning | 85.4 | 33 | 80.6 | 73 | 93.5 | 28 | 0.045 |
| fatigue | 24.0 | 32 | 30.4 | 74 | 27.8 | 30 | 0.40 |
| nausea and vomiting | 3.54 | 33 | 4.76 | 77 | 1.08 | 31 | 0.08 |
| pain | 8.08 | 33 | 20.89 | 75 | 12.90 | 31 | 0.01 |
| shortness of breath | 8.08 | 33 | 20.89 | 75 | 17.20 | 31 | 0.04 |
| insomnia | 26.3 | 33 | 30.7 | 76 | 23.7 | 31 | 0.45 |
| loss of appetite | 2.0 | 33 | 9.2 | 76 | 6.5 | 31 | 0.03 |
| constipation | 17.2 | 33 | 25.7 | 74 | 16.1 | 29 | 0.17 |
| diarrhea | 2.0 | 33 | 14.4 | 74 | 9.2 | 29 | 0.003 |
| financial difficulties | 17.2 | 33 | 22.8 | 73 | 14.9 | 29 | 0.39 |
| symptoms related to the functioning of the urinary system | 24.7 | 61 | 27.9 | 87 | 16.7 | 36 | 0.003 |
| symptoms related to the functioning of intestines | 6.6 | 56 | 11.5 | 66 | 7.4 | 27 | 0.01 |
| symptoms related to hormonal treatment | 18.5 | 60 | 23.0 | 83 | 18.6 | 35 | 0.13 |
| sexual functions | 54.7 | 12 | 60.4 | 27 | 52.2 | 16 | 0.52 |

Table 4. Scoring of the IIEF-5 of 189 patients depending on the treatment method.

| IIEF-5 | Group A  (N=24) | Group B  (N=64) | Group C  (N=30) | p (Kruskal-Wallis ANOVA test) |
| --- | --- | --- | --- | --- |
| Severe erectile dysfunction  Moderate erectile dysfunction  Mild to moderate erectile dysfunction  Mild erectile dysfunction  absence of erectile dysfunction | 19 (78.2%)  2 (8.3%)  3 (12.5%)  0  0 | 48 (75%)  3 (4.7%)  9 (14.1%)  4 (6.2%)  0 | 15 (50%)  5 (16.7%)  7 (23.3%)  3 (10%)  0 | 0.033 |
